# Supplementary material for: Early cessation of calcineurin inhibitors is feasible post–haploidentical blood stem cell transplant: the ANZHIT 1 study
Source: PubMed Central journal article supplement — Blood Adv. 2023 Jul 21;7(18):5554–65. doi: 10.1182/bloodadvances.2023009840 (PMC10514140; doi:10.1182/bloodadvances.2023009840), 2023-07-21
Supplement: BLOODA_ADV-2023-009840-mmc1.pdf [file BLOODA_ADV-2023-009840-mmc1.pdf]

**Supplementary Tables and Figures – MS#ADV-2023-0009840**

**Table 1 – Disease status at transplantation**

|                  | <b>MAC</b> | <b>RIC</b> |
|------------------|------------|------------|
| <b>n</b>         | 32         | 46         |
| <b>Diagnoses</b> |            |            |
| <b>AML</b>       | 14 (43.8)  | 25 (54.3)  |
| CR1              | 8          | 13         |
| CR2              | 6          | 11         |
| >CR2             | 0          | 1          |
| <b>ALL</b>       | 9(28.1)    | 3(6.5)     |
| CR1              | 7          | 1          |
| CR2              | 2          | 2          |
| <b>CML</b>       |            |            |
| CP1              | 1(3.1)     | 0          |
| <b>MDS</b>       | 3 (9.3)    | 2 (4.3)    |
| <b>NHL:</b>      | 3 (9.3)    | 7 (15.2)   |
| CR1              | 0          | 1          |
| CR2              | 1          | 1          |
| >CR2/PR          | 2          | 5          |
| <b>HL</b>        | 0          | 4 (8.7)    |
| CR1              | -          | 0          |
| CR2              | -          | 2          |
| >CR2/PR          | -          | 2          |
| <b>MPD</b>       | 2 (6.2)    | 3 (6.5)    |
| <b>MM CR1</b>    | -          | 1 (2.2)    |
| <b>CLL PR</b>    | -          | 1 (2.2)    |

**Table 2:** VOD characteristics and outcome

| <b>Patient</b>                        | <b>HSCT</b> | <b>Day post HSCT</b> | <b>Severity*</b> | <b>Outcome</b>                                                                        |
|---------------------------------------|-------------|----------------------|------------------|---------------------------------------------------------------------------------------|
| <b>RAH01</b><br><br>59yo M<br>AML CR2 | RIC         | D157                 | Severe           | Deceased D 232<br>COD: GHVD, graft failure                                            |
| <b>RMH16</b><br><br>50yo M<br>AML CR2 | MAC         | D34                  | Very severe      | Alive after a course of<br>defibrotide                                                |
| <b>SVH14</b><br><br>20yo M<br>ALL CR2 | MAC         | D28                  | Moderate         | VOD responded to Defibrotide Rx<br>Deceased D 1065<br>COD: Chronic GVHD lung post DLI |
| <b>SVH21</b><br><br>31yo F<br>ALL CR1 | MAC         | D35                  | Very Severe      | Alive after a course of<br>defibrotide                                                |

**Abbreviations:** VOD = veno-occlusive disease, MAC = myeloablative HSCT, RIC = reduced intensity HSCT, COD= cause of death. DLI – Donor lymphocyte infusion. \* as measured by EBMT criteria 2016.

**Table 3:** Cause of death due to transplant-related mortality (TRM) at 12 months post HSCT

3(a) – MAC recipients

| <b>Patient</b>                         | <b>Day post HSCT</b> | <b>Cause of death</b>                                                           |
|----------------------------------------|----------------------|---------------------------------------------------------------------------------|
| <b>RMH17</b><br><br>38yo M<br>CML CP1  | 273                  | GVHD                                                                            |
| <b>SVH 02</b><br><br>28yo F<br>AML CR1 | 156                  | Sepsis/secondary graft failure                                                  |
| <b>SVH 01</b><br><br>44yo M<br>MDS     | 304                  | Progressive disease post First MAC Haplo<br>Died post Second RIC Haplo from VOD |
| <b>SVH 05</b><br><br>54yo F<br>ALL CR1 | 67                   | Severe gut GVHD                                                                 |
| <b>WMH 01</b><br><br>22yo M<br>ALL CR1 | 149                  | Multi-organ failure                                                             |
| <b>WMH04</b><br><br>38yo F<br>NHL CR3  | 28                   | Respiratory failure                                                             |
|                                        |                      |                                                                                 |

3(b) – RIC recipients

| Patient                                | Days post HSCT | Cause of death                                                     |
|----------------------------------------|----------------|--------------------------------------------------------------------|
| <b>RAH01</b><br><br>59yo M<br>AML CR2  | 232            | GVHD/graft failure                                                 |
| <b>RMH010</b><br><br>59yo M<br>AML CR1 | 233            | Respiratory failure due to interstitial pneumonitis and lung cGVHD |
| <b>SVH016</b><br><br>55yo M<br>AML CR1 | 123            | Fungal and bacterial infection                                     |
| <b>WMH21</b><br><br>69yo M<br>AML CR2  | 39             | Bacterial infection                                                |

**Table 4:** Individual Tapering of CNI with timelines and outcome**Table 4(a):** Early disease recurrence/low chimerism – excluded from elective CNI analysis.

| Patient | Chimerism D40 | CNI Stop (day) | Acute GVHD D100 | Chronic GVHD 1 year | Outcome                             | Survival days |
|---------|---------------|----------------|-----------------|---------------------|-------------------------------------|---------------|
| SVH01   | 0%            | 43             | no              | -                   | Death from VOD second HSCT          | 304           |
| SVH10   | 52%           | 60             | no              | -                   | Disease Recurrence                  | 175           |
| WMH19   | 76%           | 89             | II              | no                  | Alive                               | 530           |
| RNS02   | 95%           | 126            | no              | -                   | Relapse D111, death D196            | 196           |
| SVH16   | 95%           | 72             | II              | -                   | Relapse D85                         | 123           |
| SVH02   | 100%          | 81             | no              | -                   | Secondary graft failure despite DLI | 156           |

**Table 4(b):** Early TRM (< D120) – excluded from elective CNI analysis.

| Patient | CNI Stop (day) | Acute GVHD D100 | Chronic GVHD 1 year | Cause of death      | Survival days |
|---------|----------------|-----------------|---------------------|---------------------|---------------|
| SVH05   | 67             | III             | -                   | GVHD gut            | 67            |
| WMH04   | 28             | -               | -                   | Respiratory failure | 28            |
| WMH21   | 39             | -               | -                   | Bacterial infection | 39            |

**Table 5: Donor Lymphocyte infusions**

| <b>Patient</b> | <b>Indication</b>                          | <b>Day</b> | <b>CD3<br/>Dose<br/>X 10<sup>6</sup>/kg</b> | <b>Outcome</b>                                                   | <b>Alive<br/>(y/n)</b> | <b>Day</b> |
|----------------|--------------------------------------------|------------|---------------------------------------------|------------------------------------------------------------------|------------------------|------------|
| <b>SVH02</b>   | Secondary<br>Graft failure                 | 105        | 0.5                                         | Death due to<br>infection/graft<br>failure                       | n                      | 156        |
| <b>RAH01</b>   | Donor<br>chimerism<br>71%                  | 122        | 0.5                                         | Acute GVHD III on<br>day 141<br>Death from GVHD                  | n                      | 232        |
| <b>RAH02</b>   | Loss of<br>chimerism                       | 601        | 0.5                                         | No GVHD but<br>continued<br>pancytopenia.<br>Multiple infections | n                      | 781        |
| <b>WMH13</b>   | Early disease<br>recurrence<br>(molecular) | 125        | 0.5                                         | No GVHD                                                          | y                      | 1016       |
| <b>SVH13</b>   | Pancytopenia<br>Full donor<br>chimerism    | 166        | 0.5                                         | Moderate Chronic<br>GVHD                                         | y                      | 1096       |
| <b>SVH14</b>   | Pre-emptive<br>ALL CR2                     | 121        | 0.5                                         | Severe chronic<br>GVHD<br>CNS Relapse of<br>disease              | n                      | 1065       |

**Figure 1:** CMV viraemia cumulative incidence (using CMV +ve recipients as denominator)

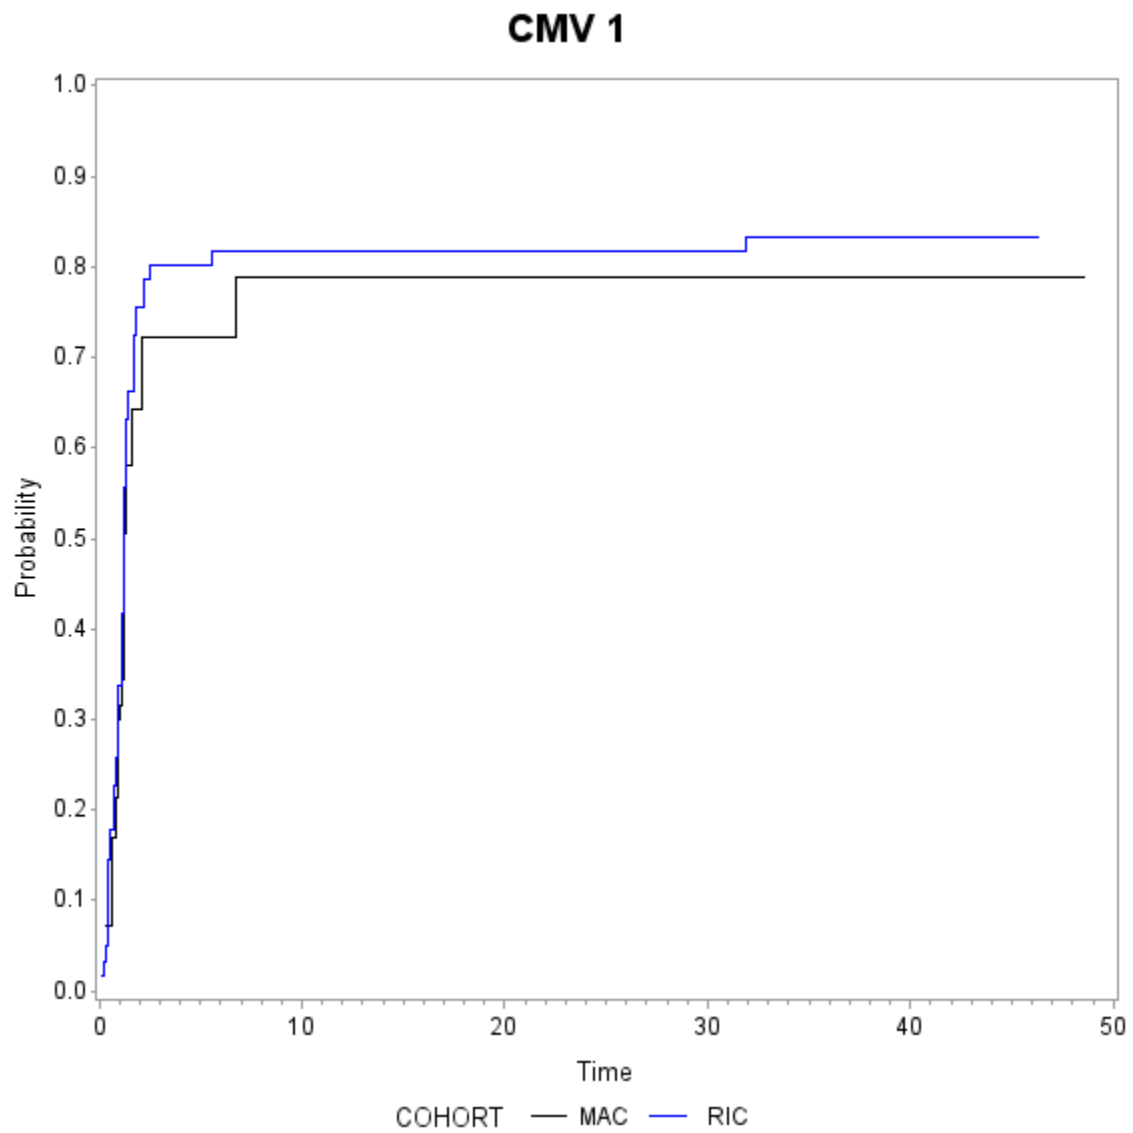

**Figure 2:** CNI cessation cohorts

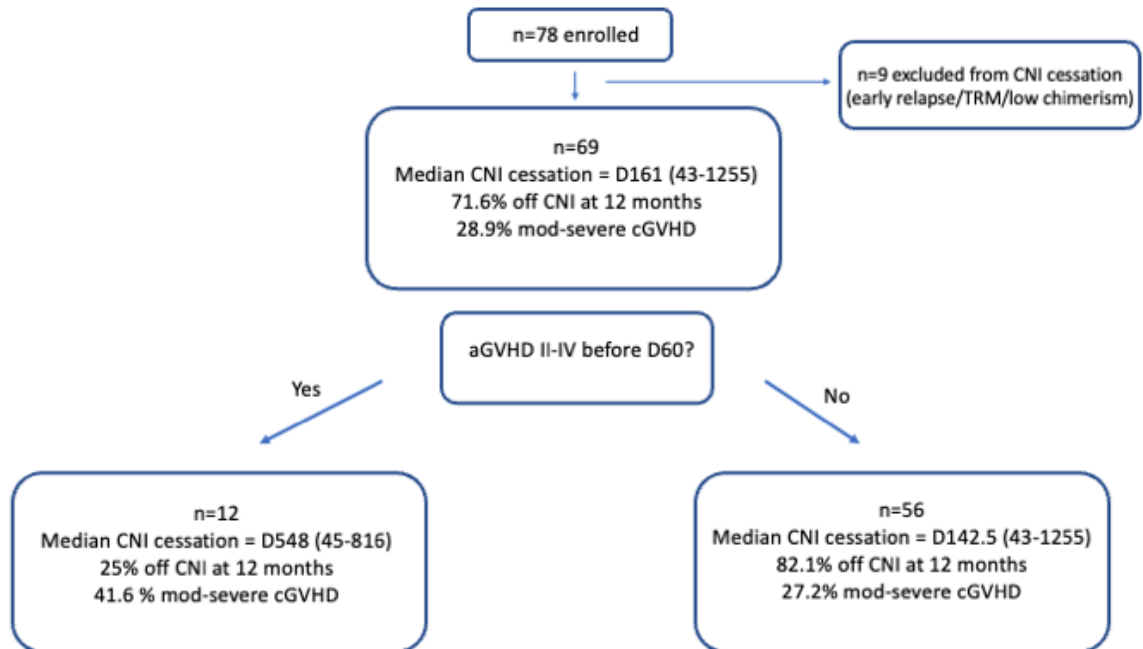



**Figure 3: AML survival curves**

**3(a): AML Disease Free Survival**

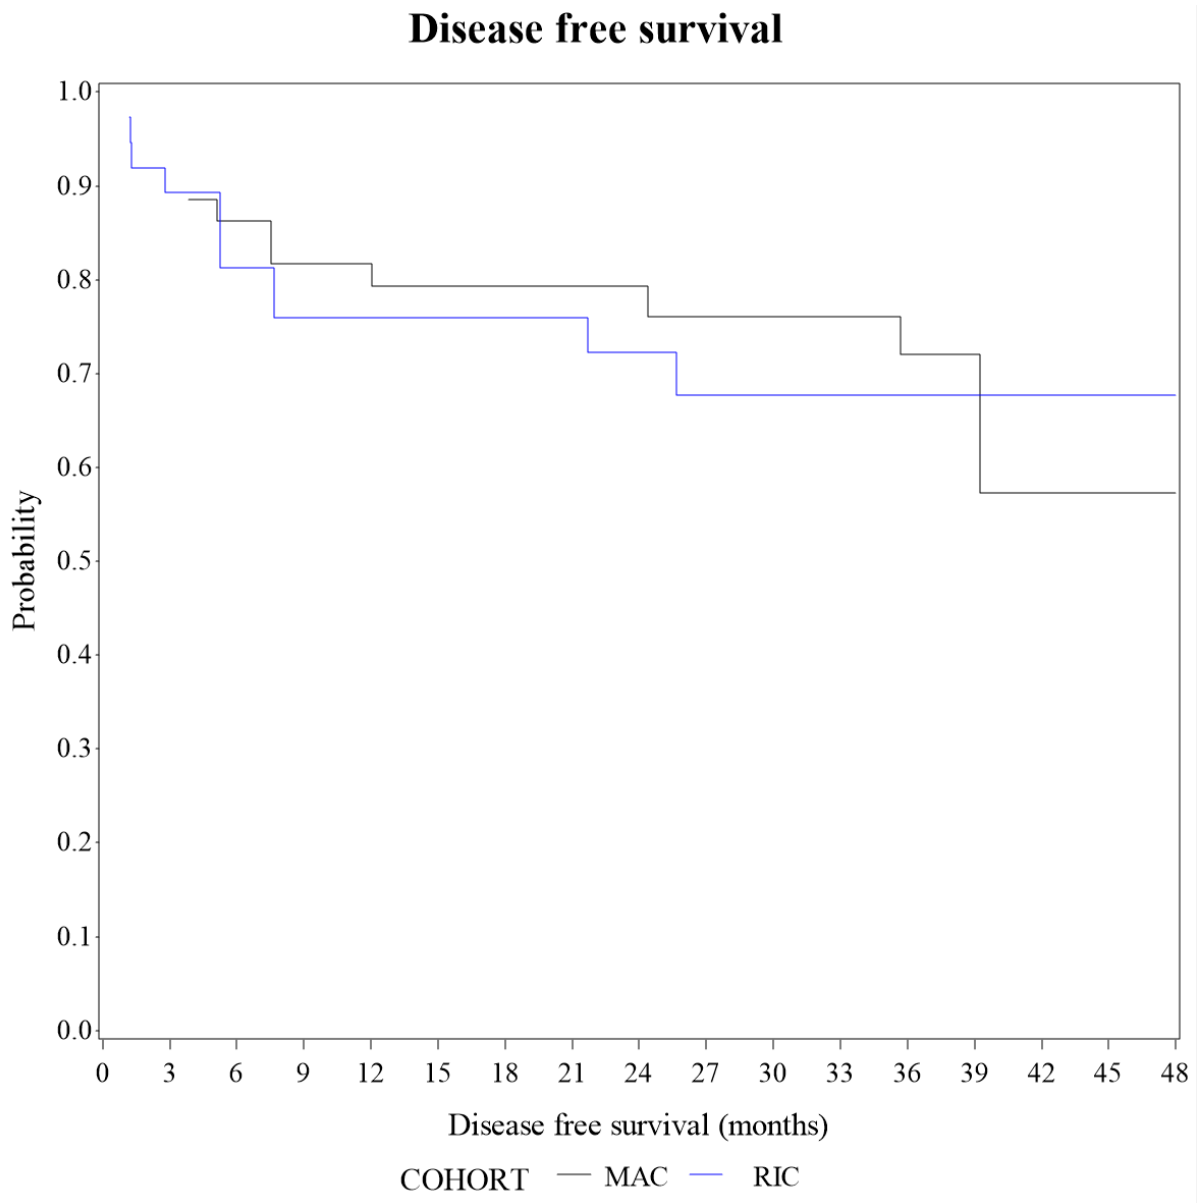

**3(b): AML overall survival**

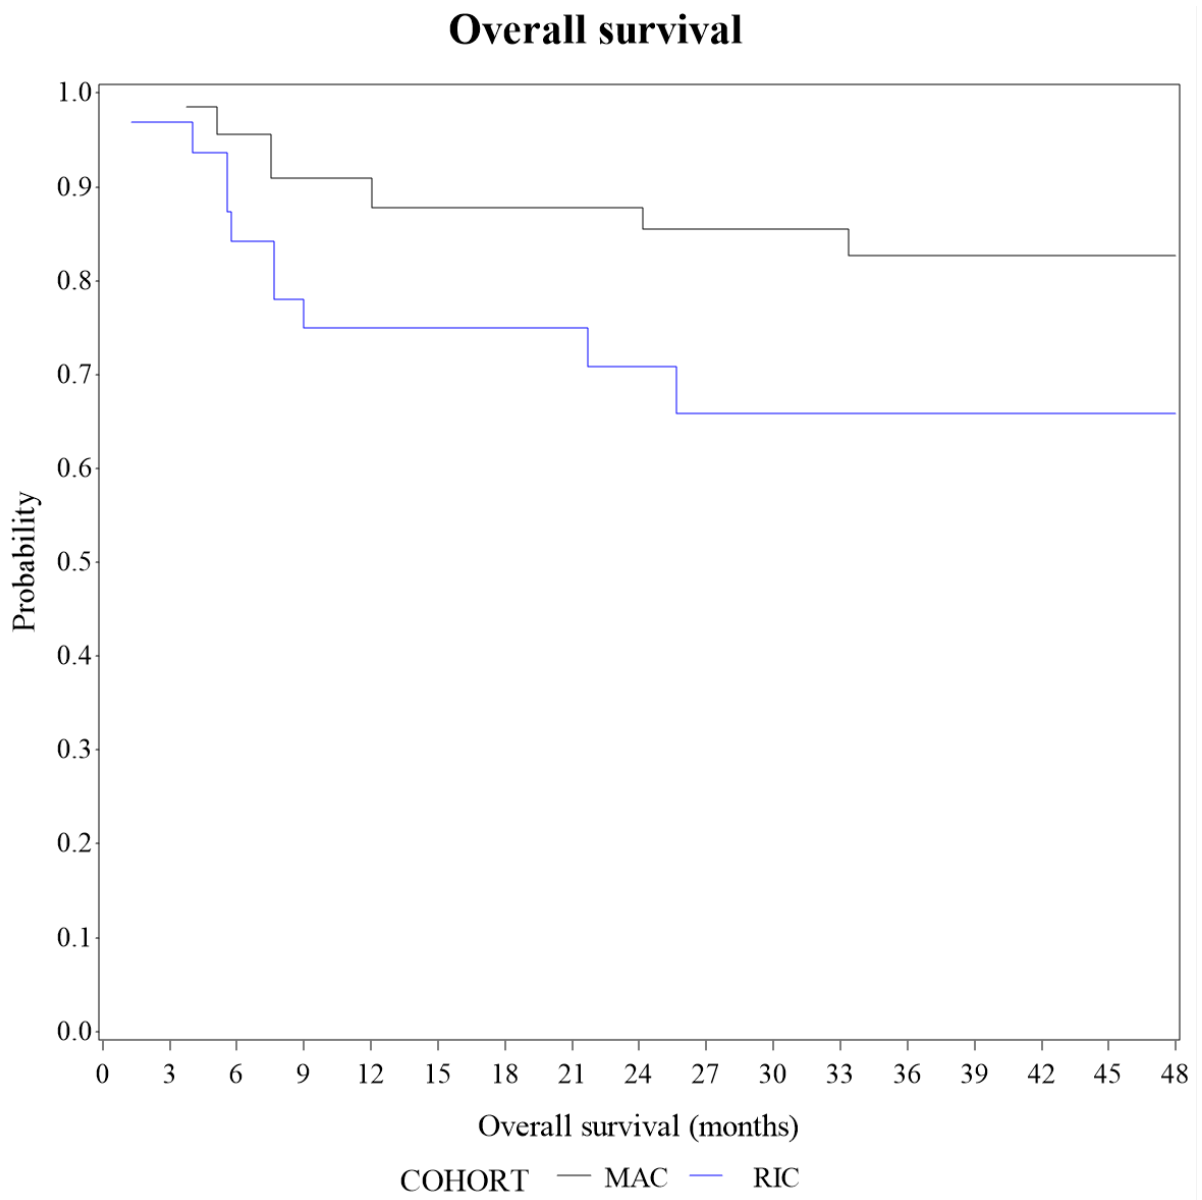

**Table 6: Univariate analysis – Disease Free Survival**

| Covariate                                               | Comparison                                                    | Point Estimate | Lower 95% Wald Confidence Limit | Upper 95% Wald Confidence Limit | Pr > ChiSq |
|---------------------------------------------------------|---------------------------------------------------------------|----------------|---------------------------------|---------------------------------|------------|
| Cohort                                                  | MAC vs RIC                                                    | 1.033          | 0.486                           | 2.196                           | 0.9324     |
| Age group (patient)                                     | <60 years vs >=60 years                                       | 1.106          | 0.470                           | 2.605                           | 0.8170     |
| DRI                                                     | High/V high vs Low/Int                                        | 2.334          | 0.980                           | 5.559                           | 0.0557     |
| Previous autologous transplant                          | No vs Yes                                                     | 1.745          | 0.414                           | 7.359                           | 0.4485     |
| HCT CL (age)                                            | <3 vs >=3                                                     | 0.748          | 0.259                           | 2.159                           | 0.5913     |
| Age group (donor)                                       | <40 years vs >=40 years                                       | 0.736          | 0.345                           | 1.574                           | 0.4296     |
| CMV status of patient/donor                             | Patient and donor negative vs Patient and donor positive      | 0.579          | 0.194                           | 1.729                           | 0.4205     |
|                                                         | Patient and donor negative vs Patient positive/donor negative | 0.985          | 0.277                           | 3.509                           | .          |
|                                                         | Patient and donor positive vs Patient positive/donor negative | 1.702          | 0.653                           | 4.434                           | .          |
| AML                                                     | AML vs Other                                                  | 0.746          | 0.353                           | 1.578                           | 0.4434     |
| aGVHD grade II-IV                                       | Grade II-IV aGVHD vs None/grade I aGVHD                       | 0.933          | 0.422                           | 2.063                           | 0.8631     |
| Elective cessation of CNI <D120 excluding non-electives | CNI ceased > 120 days vs CNI electively ceased <= 120 days    | 0.629          | 0.259                           | 1.532                           | 0.3075     |
| cGVHD within 12 months                                  | Mod/severe vs None/mild                                       | 1.171          | 0.527                           | 2.602                           | 0.6979     |
| CR at transplant                                        | No vs Yes                                                     | 0.678          | 0.203                           | 2.261                           | 0.5271     |
| Donor relationship                                      | Child vs Other                                                | 0.610          | 0.199                           | 1.866                           | 0.5879     |
|                                                         | Child vs Sibling                                              | 0.668          | 0.283                           | 1.581                           | .          |
|                                                         | Other vs Sibling                                              | 1.096          | 0.398                           | 3.020                           | .          |
| CD34 dose category                                      | < median vs >= median                                         | 0.989          | 0.447                           | 2.188                           | 0.9777     |
| CD3 count category                                      | < median vs >= median                                         | 0.724          | 0.342                           | 1.532                           | 0.3984     |
| cd34cat2                                                | CD34 dose <5 vs CD34 dose =5                                  | 0.824          | 0.359                           | 1.889                           | 0.5969     |
|                                                         | CD34 dose <5 vs CD34 dose >5                                  | 1.450          | 0.446                           | 4.712                           | .          |
|                                                         | CD34 dose =5 vs CD34 dose >5                                  | 1.760          | 0.581                           | 5.325                           | .          |

**Table 7: Univariate analysis – overall survival**

| Covariate                                               | Comparison                                                    | Point Estimate | Lower 95% Wald Confidence Limit | Upper 95% Wald Confidence Limit | Pr > ChiSq |
|---------------------------------------------------------|---------------------------------------------------------------|----------------|---------------------------------|---------------------------------|------------|
| Cohort                                                  | MAC vs RIC                                                    | 1.085          | 0.480                           | 2.451                           | 0.8448     |
| Age group (patient)                                     | <60 years vs >=60 years                                       | 1.163          | 0.461                           | 2.934                           | 0.7492     |
| DRI                                                     | High/V high vs Low/Int                                        | 2.509          | 1.038                           | 6.064                           | 0.0410     |
| Previous autologous transplant                          | No vs Yes                                                     | 2.978          | 0.401                           | 22.097                          | 0.2859     |
| HCT CL (age)                                            | <3 vs >=3                                                     | 0.683          | 0.233                           | 2.006                           | 0.4882     |
| Age group (donor)                                       | <40 years vs >=40 years                                       | 0.794          | 0.347                           | 1.818                           | 0.5852     |
| CMV status of patient/donor                             | Patient and donor negative vs Patient and donor positive      | 0.508          | 0.147                           | 1.757                           | 0.2390     |
|                                                         | Patient and donor negative vs Patient positive/donor negative | 1.242          | 0.273                           | 5.657                           | .          |
|                                                         | Patient and donor positive vs Patient positive/donor negative | 2.443          | 0.762                           | 7.826                           | .          |
| AML                                                     | AML vs Other                                                  | 0.724          | 0.321                           | 1.631                           | 0.4355     |
| aGVHD grade II-IV                                       | Grade II-IV aGVHD vs None/grade I aGVHD                       | 0.814          | 0.337                           | 1.965                           | 0.6465     |
| Elective cessation of CNI <D120 excluding non-electives | CNI ceased > 120 days vs CNI electively ceased <= 120 days    | 0.613          | 0.236                           | 1.596                           | 0.3161     |
| cGVHD within 12 months                                  | Mod/severe vs None/mild                                       | 1.412          | 0.617                           | 3.232                           | 0.4135     |
| CR at transplant                                        | No vs Yes                                                     | 0.824          | 0.244                           | 2.778                           | 0.7543     |
| Donor relationship                                      | Child vs Other                                                | 0.517          | 0.167                           | 1.599                           | 0.4634     |
|                                                         | Child vs Sibling                                              | 0.944          | 0.378                           | 2.358                           | .          |
|                                                         | Other vs Sibling                                              | 1.826          | 0.630                           | 5.294                           | .          |
| CD34 dose category                                      | < median vs >= median                                         | 1.061          | 0.452                           | 2.488                           | 0.8922     |
| CD3 count category                                      | < median vs >= median                                         | 0.682          | 0.303                           | 1.536                           | 0.3551     |
| cd34cat2                                                | CD34 dose <5 vs CD34 dose =5                                  | 0.807          | 0.337                           | 1.935                           | 0.3099     |
|                                                         | CD34 dose <5 vs CD34 dose >5                                  | 2.554          | 0.542                           | 12.041                          | .          |
|                                                         | CD34 dose =5 vs CD34 dose >5                                  | 3.164          | 0.718                           | 13.933                          | .          |

**Table 8:** Univariate analysis – Graft versus host disease, relapse-free survival (GRFS)

| Covariate                                               | Comparison                                                    | Point Estimate | Lower 95% Wald Confidence Limit | Upper 95% Wald Confidence Limit | Pr > ChiSq |
|---------------------------------------------------------|---------------------------------------------------------------|----------------|---------------------------------|---------------------------------|------------|
| Cohort                                                  | MAC vs RIC                                                    | 0.776          | 0.395                           | 1.522                           | 0.4598     |
| Age group (patient)                                     | <60 years vs >=60 years                                       | 0.920          | 0.443                           | 1.912                           | 0.8235     |
| DRI                                                     | High/V high vs Low/Int                                        | 2.358          | 1.099                           | 5.062                           | 0.0277     |
| Previous autologous transplant                          | No vs Yes                                                     | 0.908          | 0.319                           | 2.585                           | 0.8567     |
| HCT CL (age)                                            | <3 vs >=3                                                     | 0.588          | 0.244                           | 1.417                           | 0.2366     |
| Age group (donor)                                       | <40 years vs >=40 years                                       | 0.769          | 0.393                           | 1.504                           | 0.4424     |
| CMV status of patient/donor                             | Patient and donor negative vs Patient and donor positive      | 0.867          | 0.351                           | 2.141                           | 0.6610     |
|                                                         | Patient and donor negative vs Patient positive/donor negative | 1.282          | 0.427                           | 3.852                           | .          |
|                                                         | Patient and donor positive vs Patient positive/donor negative | 1.479          | 0.632                           | 3.462                           | .          |
| AML                                                     | AML vs Other                                                  | 0.884          | 0.457                           | 1.710                           | 0.7146     |
| Elective cessation of CNI <D120 excluding non-electives | CNI ceased > 120 days vs CNI electively ceased <= 120 days    | 1.259          | 0.587                           | 2.699                           | 0.5547     |
| CR at transplant                                        | No vs Yes                                                     | 0.731          | 0.257                           | 2.077                           | 0.5567     |
| Donor relationship                                      | Child vs Other                                                | 1.093          | 0.385                           | 3.104                           | 0.8841     |
|                                                         | Child vs Sibling                                              | 0.878          | 0.425                           | 1.813                           | .          |
|                                                         | Other vs Sibling                                              | 0.803          | 0.299                           | 2.154                           | .          |
| CD34 dose category                                      | < median vs >= median                                         | 0.762          | 0.367                           | 1.584                           | 0.4665     |
| CD3 count category                                      | < median vs >= median                                         | 0.633          | 0.326                           | 1.230                           | 0.1772     |
| cd34cat2                                                | CD34 dose <5 vs CD34 dose =5                                  | 0.627          | 0.293                           | 1.346                           | 0.3372     |
|                                                         | CD34 dose <5 vs CD34 dose >5                                  | 1.080          | 0.392                           | 2.974                           | .          |
|                                                         | CD34 dose =5 vs CD34 dose >5                                  | 1.721          | 0.690                           | 4.297                           | .          |

**Table 9:** Univariate analysis – transplant related mortality

| Covariate                                               | Hazard ratio | comparison                                                    | P value |
|---------------------------------------------------------|--------------|---------------------------------------------------------------|---------|
| Cohort                                                  | 1.60159      | MAC vs RIC                                                    | 0.36492 |
| Age group (patient)                                     | 2.37396      | <60 years vs >=60 years                                       | 0.25175 |
| DRI                                                     | 0.86521      | High/V high vs Low/Int                                        | 0.84307 |
| Age group (donor)                                       | 0.94312      | <40 years vs >=40 years                                       | 0.91670 |
| CMV status of patient/donor                             | 1.15395      | Patient and donor negative vs Patient and donor positive      | 0.64642 |
| CMV status of patient/donor                             | 2.20033      | Patient and donor negative vs Patient positive/donor negative | .       |
| CMV status of patient/donor                             | 1.90678      | Patient and donor positive vs Patient positive/donor negative | .       |
| AML                                                     | 0.55559      | AML vs Other                                                  | 0.28808 |
| aGVHD grade II-IV                                       | 0.79302      | Grade II-IV aGVHD vs None/grade I aGVHD                       | 0.69612 |
| Elective cessation of CNI <D120 excluding non-electives | 0.39630      | CNI ceased > 120 days vs CNI electively ceased <= 120 days    | 0.20529 |
| cGVHD within 12 months                                  | 1.31014      | Mod/severe vs None/mild                                       | 0.61902 |
| CR at transplant                                        | 0.94582      | No vs Yes                                                     | 0.94057 |
| Donor relationship                                      | 0.24703      | Child vs Other                                                | 0.22007 |
| Donor relationship                                      | 0.29248      | Child vs Sibling                                              | .       |
| Donor relationship                                      | 1.18400      | Other vs Sibling                                              | .       |
| cd34cat                                                 | 1.59275      | < median vs >= median                                         | 0.37593 |
| cd3cat                                                  | 0.38679      | < median vs >= median                                         | 0.10426 |
